# Supplementary material for: Cyanogel auto-reduction induced synthesis of PdCo nanocubes on carbon nanobowls: a highly active electrocatalyst for ethanol electrooxidation
Source: Royal Society of Chemistry journal article supplement (doi:10.1039/c9nr04767k), 2019-01-01
Supplement: c9nr04767k1.pdf [file c9nr04767k1.pdf]

## Electronic Supplementary Information

### **Cyanogel auto-reduction induced synthesis of PdCo nanocubes on carbon nanobowls: A highly active electrocatalyst for ethanol electrooxidation**

Guang-Rui Xu,<sup>‡a</sup> Ya-Nan Zhai,<sup>‡b</sup> Fu-min Li,<sup>b</sup> Guang-Tao Zhao,<sup>\*a</sup> Shu-Ni Li,<sup>b</sup> Hong-Chang Yao,<sup>c</sup> Jia-Xing Jiang,<sup>a</sup> and Yu Chen<sup>\*a</sup>

<sup>a</sup> *Key Laboratory of Macromolecular Science of Shaanxi Province, Key Laboratory of Applied Surface and Colloid Chemistry (Ministry of Education), Shaanxi Key Laboratory for Advanced Energy Devices, School of Materials Science and Engineering, Shaanxi Normal University, Xi'an 710062, PR China*

<sup>b</sup> *School of Chemistry and Chemical Engineering, Shaanxi Normal University, Xi'an 710062, PR China.*

<sup>c</sup> *College of Chemistry and Molecular Engineering, Zhengzhou University, Zhengzhou 450001, PR China*

*\*Corresponding authors:*

*E-mail: ndchenyu@gmail.com (Y. Chen); zhaoguangtao@snnu.edu.cn (G. Zhao)*

*‡ These two authors made an equal contribution to this work.*

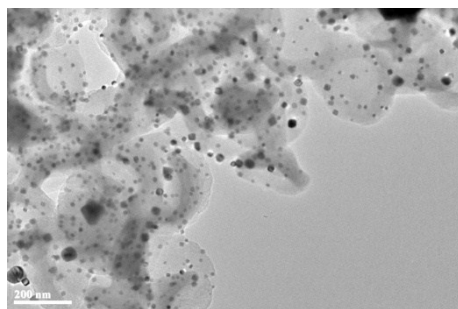

**Fig. S1.** Low-resolution TEM image of Pd<sub>2</sub>Co<sub>1</sub>/CNBs nanohybrids.

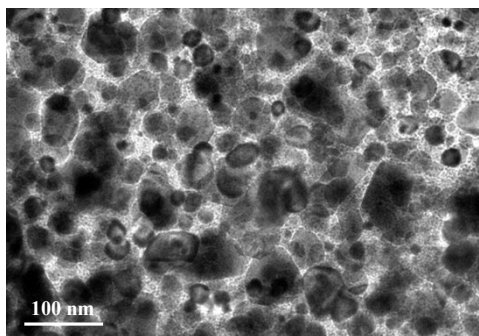

**Fig. S2.** TEM image of K<sub>2</sub>PdCl<sub>4</sub>-K<sub>3</sub>Co(CN)<sub>6</sub> cyanogel without CNBs after calcined at 650 °C.

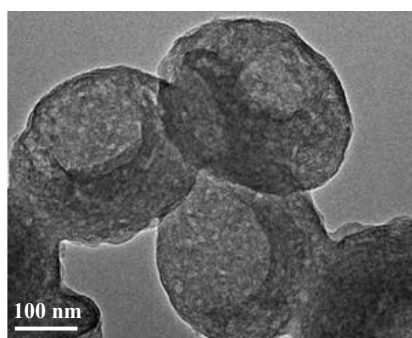

**Fig. S3.** TEM image of CNBs.

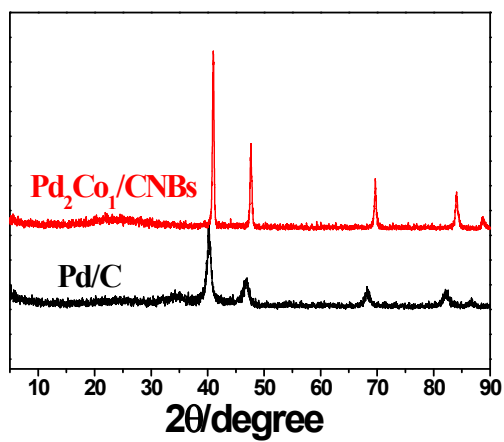

**Fig. S4.** XRD pattern of Pd<sub>2</sub>Co<sub>1</sub>/CNBs nanohybrids and commercial Pd/C electrocatalyst.

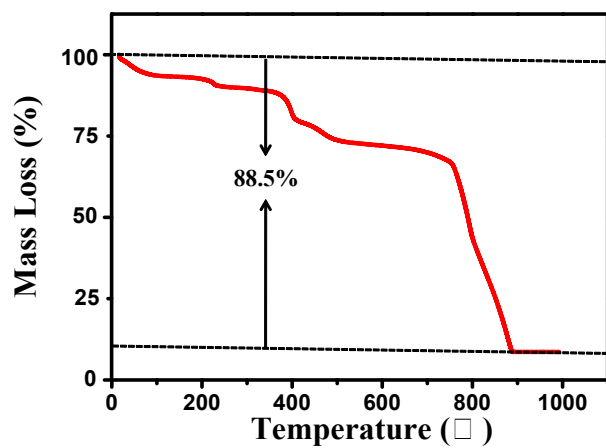

**Fig. S5.** TGA curve of Pd<sub>2</sub>Co<sub>1</sub>/CNBs nanohybrids.

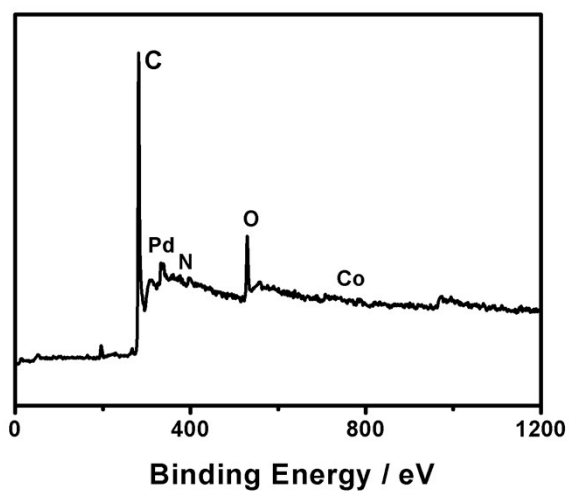

**Fig. S6.** XPS spectrum of Pd<sub>2</sub>Co<sub>1</sub>/CNBs nanohybrids.

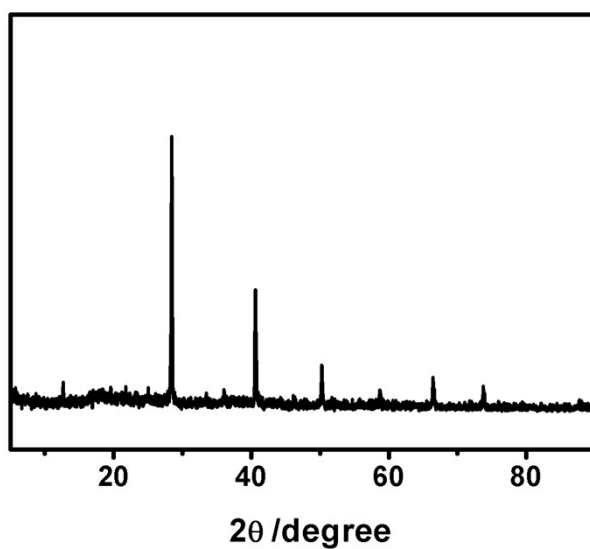

**Fig. S7.** XRD pattern of K<sub>2</sub>PdCl<sub>4</sub>-K<sub>3</sub>Co(CN)<sub>6</sub> cyanogel.

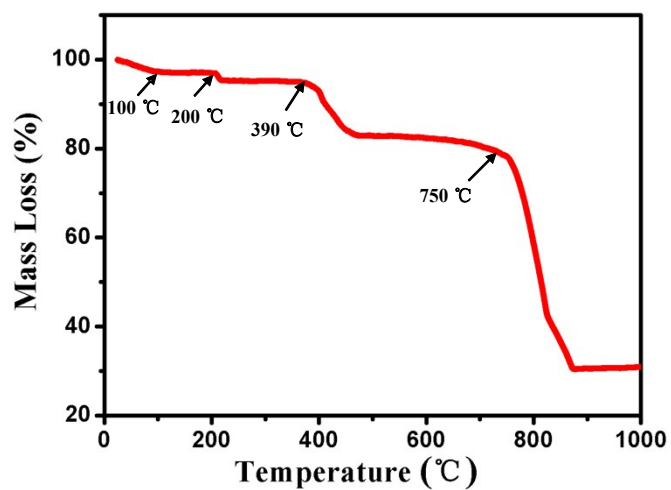

**Fig. S8.** TGA curve of  $K_2PdCl_4-K_3Co(CN)_6$  cyanogel at a heating rate of  $5\text{ }^\circ\text{C min}^{-1}$  under  $N_2$  atmosphere.

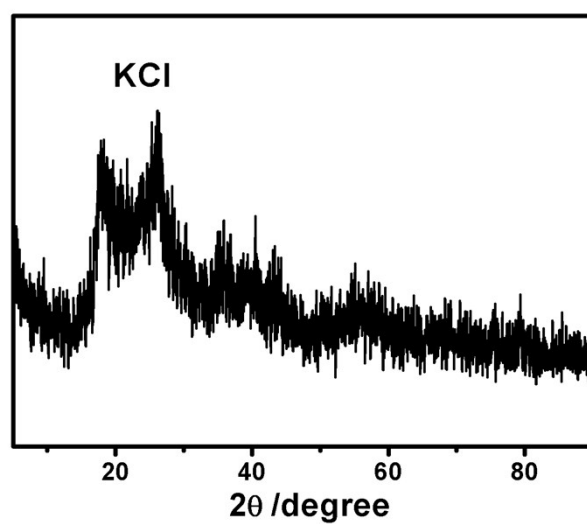

**Fig. S9.** XRD pattern of  $K_2PdCl_4-K_3Co(CN)_6$  cyanogel with CNBs after calcined at 200 °C.

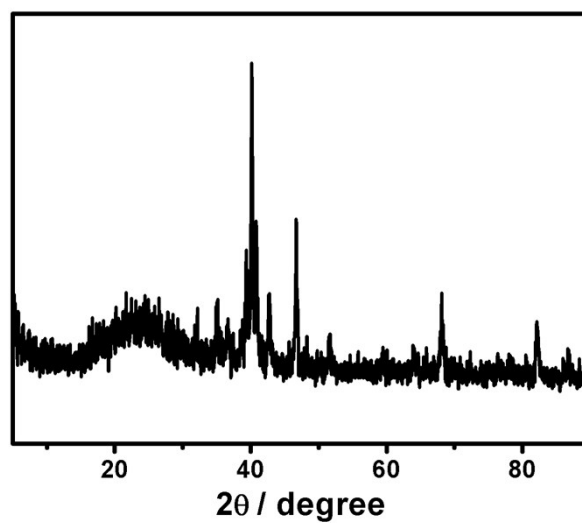

**Fig. S10.** XRD pattern of  $K_2PdCl_4$ - $K_3Co(CN)_6$  cyanogel with CNBs after calcined at 300 °C.

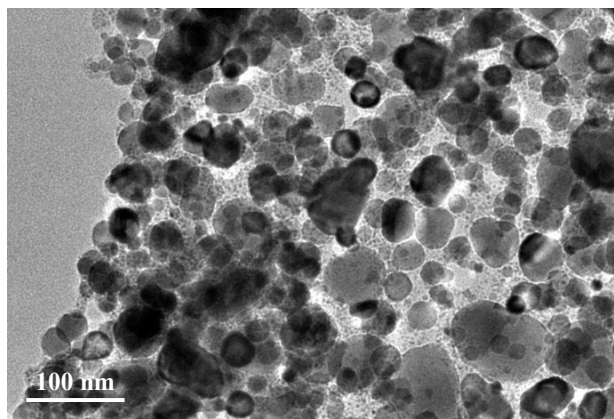

**Fig. S11.** TEM image of  $K_2PdCl_4$ - $K_3Co(CN)_6$  cyanogel without CNBs after calcined at 300 °C.

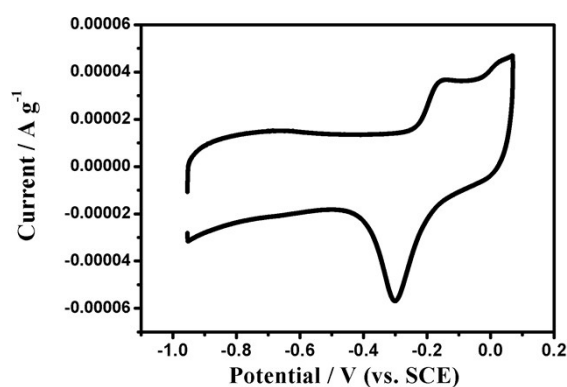

**Fig. S12.** CV curve of PdCo/CNBs- $NaBH_4$  nanohybrids prepared by conventional  $NaBH_4$  reduction method in  $N_2$ -saturated 0.1 m KOH solution at 50 mV s<sup>-1</sup>.

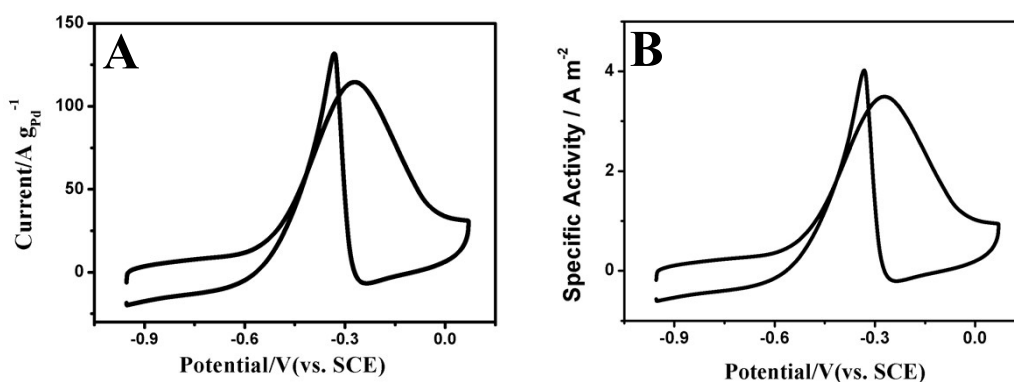

**Fig. S13.** (A) Mass-normalized and (B) ECSA-normalized CV curves of PdCo/CNBs- $NaBH_4$  nanohybrids prepared by conventional  $NaBH_4$  reduction method in  $N_2$ -saturated 0.1 M KOH solution containing 1 M ethanol at 50 mV s<sup>-1</sup>.

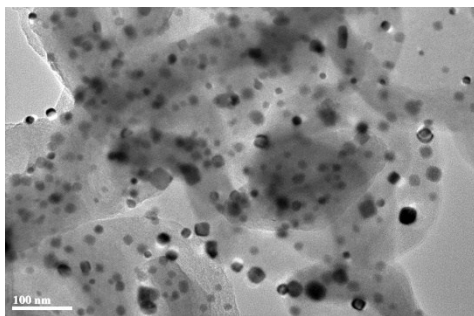

**Fig. S14.** TEM image of Pd<sub>2</sub>Co<sub>1</sub>/CNBs after chronoamperometry test.
